# Supplementary material for: Disrupting the ciliary gradient of active Arl3 affects rod photoreceptor nuclear migration
Source: eLife. 2023 Jan 4;12:e80533. doi: 10.7554/eLife.80533 (PMC9831603; doi:10.7554/eLife.80533)
Supplement: Figure 4—source data 1. [file elife-80533-fig4-data1.xlsx]

## Sheet: AT edit Samples View Report for
#2-16-21 Amanda ARL3 IP, Samples Report created on 02/15/2021
90 min grad 5-30% MeCN, 0.2% FA, Top15, AGCe6, NCE30, IT150
Proteome Discoverer 2.4, UniProt human database 2019, 20287 entrees, M - oxidation, NQ - deamidation, Cys - carbamidation
Processed in Scaffold Q+, exported in Excel, confidently identified proteins, FDR -0.8%
Exclusive Unique Spectrum Count is number of MSMS spectra identified for each protein. This is an approximated measure of protein amount in the sample
				Exclusive Unique Spectrum Count	Exclusive Unique Spectrum Count
Identified Proteins	Accession Number	Alternate ID	Molecular Weight	Arl3-T31N	Arl3-Q71L
Actin, cytoplasmic 2 OS=Homo sapiens GN=ACTG1 PE=1 SV=1	P63261	ACTG1	42 kDa	41	44
Heat shock 70 kDa protein 1B OS=Homo sapiens GN=HSPA1B PE=1 SV=1	P0DMV9	HSPA1B	70 kDa	27	29
Heterogeneous nuclear ribonucleoprotein K OS=Homo sapiens GN=HNRNPK PE=1 SV=1	P61978	HNRNPK	51 kDa	21	24
Tubulin beta chain OS=Homo sapiens GN=TUBB PE=1 SV=2	P07437	TUBB	50 kDa	22	23
Neutral alpha-glucosidase AB OS=Homo sapiens GN=GANAB PE=1 SV=3	Q14697	GANAB	107 kDa	25	22
Immunoglobulin kappa variable 2D-26 OS=Homo sapiens OX=9606 GN=IGKV2D-26 PE=3 SV=1	A0A0A0MRZ7	IGKV2D-26	13 kDa	20	21
Endoplasmin OS=Homo sapiens GN=HSP90B1 PE=1 SV=1	P14625	HSP90B1	92 kDa	23	21
Heat shock cognate 71 kDa protein OS=Homo sapiens GN=HSPA8 PE=1 SV=1	P11142	HSPA8	71 kDa	17	21
60 kDa heat shock protein, mitochondrial OS=Homo sapiens GN=HSPD1 PE=1 SV=2	P10809	HSPD1	61 kDa	21	20
Heterogeneous nuclear ribonucleoprotein U OS=Homo sapiens GN=HNRNPU PE=1 SV=6	Q00839	HNRNPU	91 kDa	21	20
ADP-ribosylation factor-like protein 3 OS=Homo sapiens GN=ARL3 PE=1 SV=2	P36405	ARL3	20 kDa	18	19
Heterogeneous nuclear ribonucleoprotein A1 OS=Homo sapiens GN=HNRNPA1 PE=1 SV=5	P09651	HNRNPA1	39 kDa	22	19
ATP synthase subunit beta, mitochondrial OS=Homo sapiens GN=ATP5B PE=1 SV=3	P06576	ATP5B	57 kDa	17	19
Tubulin alpha-1B chain OS=Homo sapiens GN=TUBA1B PE=1 SV=1	P68363	TUBA1B	50 kDa	24	19
RNA-binding protein FUS OS=Homo sapiens GN=FUS PE=1 SV=1	P35637	FUS	53 kDa	16	19
Annexin A2 OS=Homo sapiens GN=ANXA2 PE=1 SV=2	P07355	ANXA2	39 kDa	22	19
Protein disulfide-isomerase OS=Homo sapiens GN=P4HB PE=1 SV=3	P07237	P4HB	57 kDa	14	17
Filamin-A OS=Homo sapiens GN=FLNA PE=1 SV=4	P21333	FLNA	281 kDa	26	16
Stress-70 protein, mitochondrial OS=Homo sapiens GN=HSPA9 PE=1 SV=2	P38646	HSPA9	74 kDa	20	16
Peroxiredoxin-4 OS=Homo sapiens GN=PRDX4 PE=1 SV=1	Q13162	PRDX4	31 kDa	16	16
Eukaryotic translation initiation factor 4B OS=Homo sapiens GN=EIF4B PE=1 SV=2	P23588	EIF4B	69 kDa	15	15
Endoplasmic reticulum chaperone BiP OS=Homo sapiens OX=9606 GN=HSPA5 PE=1 SV=2	P11021	HSPA5	72 kDa	16	15
Elongation factor Tu, mitochondrial OS=Homo sapiens GN=TUFM PE=1 SV=2	P49411	TUFM	50 kDa	19	15
U4/U6 small nuclear ribonucleoprotein Prp31 OS=Homo sapiens GN=PRPF31 PE=1 SV=2	Q8WWY3	PRPF31	55 kDa	16	14
ATP-dependent RNA helicase DDX3X OS=Homo sapiens GN=DDX3X PE=1 SV=3	O00571	DDX3X	73 kDa	13	14
Heterogeneous nuclear ribonucleoproteins A2/B1 OS=Homo sapiens GN=HNRNPA2B1 PE=1 SV=2	P22626	HNRNPA2B1	37 kDa	15	14
Lamin-B1 OS=Homo sapiens GN=LMNB1 PE=1 SV=2	P20700	LMNB1	66 kDa	13	13
THO complex subunit 4 OS=Homo sapiens GN=ALYREF PE=1 SV=3	Q86V81	ALYREF	27 kDa	16	13
Hornerin OS=Homo sapiens GN=HRNR PE=1 SV=2	Q86YZ3	HRNR	282 kDa	11	12
Sodium/potassium-transporting ATPase subunit alpha-1 OS=Homo sapiens GN=ATP1A1 PE=1 SV=1	P05023	ATP1A1	113 kDa	10	12
ATP synthase subunit alpha, mitochondrial OS=Homo sapiens GN=ATP5A1 PE=1 SV=1	P25705	ATP5A1	60 kDa	9	12
3-hydroxyacyl-CoA dehydrogenase type-2 OS=Homo sapiens GN=HSD17B10 PE=1 SV=3	Q99714	HSD17B10	27 kDa	17	12
Protein XRP2 OS=Homo sapiens GN=RP2 PE=1 SV=4	O75695	RP2	40 kDa	3	11
ADP/ATP translocase 2 OS=Homo sapiens GN=SLC25A5 PE=1 SV=7	P05141	SLC25A5	33 kDa	11	11
Vimentin OS=Homo sapiens GN=VIM PE=1 SV=4	P08670	VIM	54 kDa	10	11
Malate dehydrogenase, mitochondrial OS=Homo sapiens GN=MDH2 PE=1 SV=3	P40926	MDH2	36 kDa	11	11
Heat shock protein 75 kDa, mitochondrial OS=Homo sapiens GN=TRAP1 PE=1 SV=3	Q12931	TRAP1	80 kDa	11	11
Acyl-coenzyme A thioesterase 9, mitochondrial OS=Homo sapiens GN=ACOT9 PE=1 SV=2	Q9Y305	ACOT9	50 kDa	11	11
Src substrate cortactin OS=Homo sapiens GN=CTTN PE=1 SV=2	Q14247	CTTN	62 kDa	10	11
RNA-binding protein 10 OS=Homo sapiens GN=RBM10 PE=1 SV=3	P98175	RBM10	104 kDa	9	10
Splicing factor, proline- and glutamine-rich OS=Homo sapiens GN=SFPQ PE=1 SV=2	P23246	SFPQ	76 kDa	9	10
Sarcoplasmic/endoplasmic reticulum calcium ATPase 2 OS=Homo sapiens GN=ATP2A2 PE=1 SV=1	P16615	ATP2A2	115 kDa	4	10
Oxygen-dependent coproporphyrinogen-III oxidase, mitochondrial OS=Homo sapiens GN=CPOX PE=1 SV=3	P36551	CPOX	50 kDa	14	10
Ornithine aminotransferase, mitochondrial OS=Homo sapiens GN=OAT PE=1 SV=1	P04181	OAT	49 kDa	9	10
Protein FRG1 OS=Homo sapiens GN=FRG1 PE=1 SV=1	Q14331	FRG1	29 kDa	6	9
Splicing factor U2AF 65 kDa subunit OS=Homo sapiens GN=U2AF2 PE=1 SV=4	P26368	U2AF2	54 kDa	12	9
Delta-1-pyrroline-5-carboxylate synthase OS=Homo sapiens GN=ALDH18A1 PE=1 SV=2	P54886	ALDH18A1	87 kDa	7	9
Dolichyl-diphosphooligosaccharide--protein glycosyltransferase subunit 2 OS=Homo sapiens GN=RPN2 PE=1 SV=3	P04844	RPN2	69 kDa	9	9
rRNA 2'-O-methyltransferase fibrillarin OS=Homo sapiens GN=FBL PE=1 SV=2	P22087	FBL	34 kDa	10	9
Protein disulfide-isomerase A3 OS=Homo sapiens GN=PDIA3 PE=1 SV=4	P30101	PDIA3	57 kDa	12	9
Serine hydroxymethyltransferase, mitochondrial OS=Homo sapiens GN=SHMT2 PE=1 SV=3	P34897	SHMT2	56 kDa	11	9
Calreticulin OS=Homo sapiens GN=CALR PE=1 SV=1	P27797	CALR	48 kDa	10	9
DNA replication licensing factor MCM3 OS=Homo sapiens GN=MCM3 PE=1 SV=3	P25205	MCM3	91 kDa	10	9
Probable ATP-dependent RNA helicase DDX17 OS=Homo sapiens GN=DDX17 PE=1 SV=2	Q92841	DDX17	80 kDa	10	8
Calnexin OS=Homo sapiens GN=CANX PE=1 SV=2	P27824	CANX	68 kDa	9	8
Dolichyl-diphosphooligosaccharide--protein glycosyltransferase subunit 1 OS=Homo sapiens GN=RPN1 PE=1 SV=1	P04843	RPN1	69 kDa	6	8
Non-POU domain-containing octamer-binding protein OS=Homo sapiens GN=NONO PE=1 SV=4	Q15233	NONO	54 kDa	6	7
Heterogeneous nuclear ribonucleoprotein H OS=Homo sapiens GN=HNRNPH1 PE=1 SV=4	P31943	HNRNPH1	49 kDa	9	7
RNA-binding protein EWS OS=Homo sapiens GN=EWSR1 PE=1 SV=1	Q01844	EWSR1	68 kDa	9	7
Voltage-dependent anion-selective channel protein 2 OS=Homo sapiens GN=VDAC2 PE=1 SV=2	P45880	VDAC2	32 kDa	6	7
Elongation factor 1-gamma OS=Homo sapiens GN=EEF1G PE=1 SV=3	P26641	EEF1G	50 kDa	7	7
Protein disulfide-isomerase A6 OS=Homo sapiens GN=PDIA6 PE=1 SV=1	Q15084	PDIA6	48 kDa	8	7
DNA replication licensing factor MCM5 OS=Homo sapiens GN=MCM5 PE=1 SV=5	P33992	MCM5	82 kDa	8	7
Mitochondrial-processing peptidase subunit alpha OS=Homo sapiens GN=PMPCA PE=1 SV=2	Q10713	PMPCA	58 kDa	4	7
Alpha-enolase OS=Homo sapiens GN=ENO1 PE=1 SV=2	P06733	ENO1	47 kDa	5	7
General transcription factor II-I OS=Homo sapiens GN=GTF2I PE=1 SV=2	P78347	GTF2I	112 kDa	7	6
Poly(rC)-binding protein 1 OS=Homo sapiens GN=PCBP1 PE=1 SV=2	Q15365	PCBP1	37 kDa	9	6
Histone H4 OS=Homo sapiens GN=HIST1H4A PE=1 SV=2	P62805	HIST1H4A	11 kDa	7	6
Elongation factor 1-alpha 1 OS=Homo sapiens GN=EEF1A1 PE=1 SV=1	P68104 (+1)	EEF1A1	50 kDa	8	6
Voltage-dependent anion-selective channel protein 1 OS=Homo sapiens GN=VDAC1 PE=1 SV=2	P21796	VDAC1	31 kDa	7	6
Monofunctional C1-tetrahydrofolate synthase, mitochondrial OS=Homo sapiens GN=MTHFD1L PE=1 SV=1	Q6UB35	MTHFD1L	106 kDa	8	6
Nucleophosmin OS=Homo sapiens GN=NPM1 PE=1 SV=2	P06748	NPM1	33 kDa	5	6
Filaggrin-2 OS=Homo sapiens GN=FLG2 PE=1 SV=1	Q5D862	FLG2	248 kDa	2	6
Pyruvate kinase PKM OS=Homo sapiens GN=PKM PE=1 SV=4	P14618	PKM	58 kDa	8	6
Myristoylated alanine-rich C-kinase substrate OS=Homo sapiens GN=MARCKS PE=1 SV=4	P29966	MARCKS	32 kDa	5	6
Citrate synthase, mitochondrial OS=Homo sapiens GN=CS PE=1 SV=2	O75390	CS	52 kDa	6	6
Thioredoxin-dependent peroxide reductase, mitochondrial OS=Homo sapiens GN=PRDX3 PE=1 SV=3	P30048	PRDX3	28 kDa	5	6
Elongation factor 2 OS=Homo sapiens GN=EEF2 PE=1 SV=4	P13639	EEF2	95 kDa	4	6
[Pyruvate dehydrogenase (acetyl-transferring)] kinase isozyme 3, mitochondrial OS=Homo sapiens GN=PDK3 PE=1 SV=1	Q15120	PDK3	47 kDa	3	6
14-3-3 protein epsilon OS=Homo sapiens GN=YWHAE PE=1 SV=1	P62258	YWHAE	29 kDa	4	6
Transitional endoplasmic reticulum ATPase OS=Homo sapiens GN=VCP PE=1 SV=4	P55072	VCP	89 kDa	5	5
Polypyrimidine tract-binding protein 1 OS=Homo sapiens GN=PTBP1 PE=1 SV=1	P26599	PTBP1	57 kDa	10	5
Histone H2B type 1-J OS=Homo sapiens GN=HIST1H2BJ PE=1 SV=3	P06899 (+3)	HIST1H2BJ	14 kDa	6	5
Transcription intermediary factor 1-beta OS=Homo sapiens GN=TRIM28 PE=1 SV=5	Q13263	TRIM28	89 kDa	4	5
Ubiquitin-60S ribosomal protein L40 OS=Homo sapiens GN=UBA52 PE=1 SV=2	P62987	UBA52	15 kDa	3	5
60S ribosomal protein L23 OS=Homo sapiens GN=RPL23 PE=1 SV=1	P62829	RPL23	15 kDa	5	5
Desmoglein-1 OS=Homo sapiens GN=DSG1 PE=1 SV=2	Q02413	DSG1	114 kDa	1	5
Peptidyl-prolyl cis-trans isomerase B OS=Homo sapiens GN=PPIB PE=1 SV=2	P23284	PPIB	24 kDa	5	5
Cold-inducible RNA-binding protein OS=Homo sapiens GN=CIRBP PE=1 SV=1	Q14011	CIRBP	19 kDa	4	5
Prelamin-A/C OS=Homo sapiens GN=LMNA PE=1 SV=1	P02545	LMNA	74 kDa	4	5
Splicing factor U2AF 35 kDa subunit OS=Homo sapiens GN=U2AF1 PE=1 SV=3	Q01081	U2AF1	28 kDa	4	5
Putative RNA-binding protein Luc7-like 2 OS=Homo sapiens GN=LUC7L2 PE=1 SV=2	Q9Y383	LUC7L2	47 kDa	4	5
Peroxiredoxin-1 OS=Homo sapiens GN=PRDX1 PE=1 SV=1	Q06830	PRDX1	22 kDa	4	5
Eukaryotic translation initiation factor 1A, X-chromosomal OS=Homo sapiens GN=EIF1AX PE=1 SV=2	P47813	EIF1AX	16 kDa	4	5
RNA-binding protein 39 OS=Homo sapiens GN=RBM39 PE=1 SV=2	Q14498	RBM39	59 kDa	6	5
Reticulocalbin-1 OS=Homo sapiens GN=RCN1 PE=1 SV=1	Q15293	RCN1	39 kDa	7	5
Very-long-chain (3R)-3-hydroxyacyl-CoA dehydratase 3 OS=Homo sapiens GN=HACD3 PE=1 SV=2	Q9P035	HACD3	43 kDa	2	5
Emerin OS=Homo sapiens GN=EMD PE=1 SV=1	P50402	EMD	29 kDa	6	5
Spindlin-1 OS=Homo sapiens GN=SPIN1 PE=1 SV=3	Q9Y657	SPIN1	30 kDa	5	5
Ras-related protein Rab-14 OS=Homo sapiens GN=RAB14 PE=1 SV=4	P61106	RAB14	24 kDa	5	5
14-3-3 protein theta OS=Homo sapiens GN=YWHAQ PE=1 SV=1	P27348	YWHAQ	28 kDa	4	5
ERO1-like protein alpha OS=Homo sapiens GN=ERO1L PE=1 SV=2	Q96HE7	ERO1L	54 kDa	2	5
Enoyl-CoA hydratase, mitochondrial OS=Homo sapiens GN=ECHS1 PE=1 SV=4	P30084	ECHS1	31 kDa	3	5
Protein unc-119 homolog B OS=Homo sapiens GN=UNC119B PE=1 SV=1	A6NIH7	UNC119B	28 kDa	0	4
Prohibitin-2 OS=Homo sapiens GN=PHB2 PE=1 SV=2	Q99623	PHB2	33 kDa	6	4
60S ribosomal protein L38 OS=Homo sapiens GN=RPL38 PE=1 SV=2	P63173	RPL38	8 kDa	3	4
ATP-dependent RNA helicase A OS=Homo sapiens GN=DHX9 PE=1 SV=4	Q08211	DHX9	141 kDa	8	4
Junction plakoglobin OS=Homo sapiens GN=JUP PE=1 SV=3	P14923	JUP	82 kDa	0	4
Serpin H1 OS=Homo sapiens GN=SERPINH1 PE=1 SV=2	P50454	SERPINH1	46 kDa	5	4
Serine/arginine-rich splicing factor 3 OS=Homo sapiens GN=SRSF3 PE=1 SV=1	P84103	SRSF3	19 kDa	5	4
Mitochondrial carrier homolog 2 OS=Homo sapiens GN=MTCH2 PE=1 SV=1	Q9Y6C9	MTCH2	33 kDa	7	4
Ras-related protein Rab-5C OS=Homo sapiens GN=RAB5C PE=1 SV=2	P51148	RAB5C	23 kDa	5	4
Ras-related protein Rab-1B OS=Homo sapiens GN=RAB1B PE=1 SV=1	Q9H0U4	RAB1B	22 kDa	3	4
Complement component 1 Q subcomponent-binding protein, mitochondrial OS=Homo sapiens GN=C1QBP PE=1 SV=1	Q07021	C1QBP	31 kDa	5	4
4F2 cell-surface antigen heavy chain OS=Homo sapiens GN=SLC3A2 PE=1 SV=3	P08195	SLC3A2	68 kDa	4	4
Dolichyl-diphosphooligosaccharide--protein glycosyltransferase 48 kDa subunit OS=Homo sapiens GN=DDOST PE=1 SV=4	P39656	DDOST	51 kDa	4	4
Sideroflexin-1 OS=Homo sapiens GN=SFXN1 PE=1 SV=4	Q9H9B4	SFXN1	36 kDa	4	4
Glutaminyl-peptide cyclotransferase-like protein OS=Homo sapiens GN=QPCTL PE=1 SV=2	Q9NXS2	QPCTL	43 kDa	3	4
Prohibitin OS=Homo sapiens GN=PHB PE=1 SV=1	P35232	PHB	30 kDa	2	4
Mitochondrial 2-oxoglutarate/malate carrier protein OS=Homo sapiens GN=SLC25A11 PE=1 SV=3	Q02978	SLC25A11	34 kDa	3	4
Heat shock protein HSP 90-beta OS=Homo sapiens GN=HSP90AB1 PE=1 SV=4	P08238	HSP90AB1	83 kDa	4	4
Heterogeneous nuclear ribonucleoprotein F OS=Homo sapiens GN=HNRNPF PE=1 SV=3	P52597	HNRNPF	46 kDa	4	4
Glutamate dehydrogenase 1, mitochondrial OS=Homo sapiens GN=GLUD1 PE=1 SV=2	P00367	GLUD1	61 kDa	5	4
Guanine nucleotide-binding protein G(I)/G(S)/G(T) subunit beta-1 OS=Homo sapiens GN=GNB1 PE=1 SV=3	P62873	GNB1	37 kDa	4	4
Heterogeneous nuclear ribonucleoprotein A3 OS=Homo sapiens GN=HNRNPA3 PE=1 SV=2	P51991	HNRNPA3	40 kDa	4	4
Glyceraldehyde-3-phosphate dehydrogenase OS=Homo sapiens GN=GAPDH PE=1 SV=3	P04406	GAPDH	36 kDa	3	4
Histone deacetylase 1 OS=Homo sapiens GN=HDAC1 PE=1 SV=1	Q13547	HDAC1	55 kDa	3	4
Serine/threonine-protein kinase 38 OS=Homo sapiens GN=STK38 PE=1 SV=1	Q15208	STK38	54 kDa	1	4
Tubulin beta-4B chain OS=Homo sapiens GN=TUBB4B PE=1 SV=1	P68371	TUBB4B	50 kDa	4	4
Cytochrome b-c1 complex subunit 1, mitochondrial OS=Homo sapiens GN=UQCRC1 PE=1 SV=3	P31930	UQCRC1	53 kDa	4	4
Alpha-actinin-4 OS=Homo sapiens GN=ACTN4 PE=1 SV=2	O43707	ACTN4	105 kDa	9	4
KH domain-containing, RNA-binding, signal transduction-associated protein 1 OS=Homo sapiens GN=KHDRBS1 PE=1 SV=1	Q07666	KHDRBS1	48 kDa	3	4
Eukaryotic translation initiation factor 3 subunit I OS=Homo sapiens GN=EIF3I PE=1 SV=1	Q13347	EIF3I	37 kDa	1	4
Glucosidase 2 subunit beta OS=Homo sapiens GN=PRKCSH PE=1 SV=2	P14314	PRKCSH	59 kDa	3	4
Reticulocalbin-2 OS=Homo sapiens GN=RCN2 PE=1 SV=1	Q14257	RCN2	37 kDa	4	4
Profilin-1 OS=Homo sapiens GN=PFN1 PE=1 SV=2	P07737	PFN1	15 kDa	2	4
Desmoplakin OS=Homo sapiens GN=DSP PE=1 SV=3	P15924	DSP	332 kDa	3	3
Heterogeneous nuclear ribonucleoprotein M OS=Homo sapiens GN=HNRNPM PE=1 SV=3	P52272	HNRNPM	78 kDa	3	3
Poly(U)-binding-splicing factor PUF60 OS=Homo sapiens GN=PUF60 PE=1 SV=1	Q9UHX1	PUF60	60 kDa	3	3
Far upstream element-binding protein 2 OS=Homo sapiens GN=KHSRP PE=1 SV=4	Q92945	KHSRP	73 kDa	3	3
DNA replication licensing factor MCM7 OS=Homo sapiens GN=MCM7 PE=1 SV=4	P33993	MCM7	81 kDa	7	3
Neutral amino acid transporter B(0) OS=Homo sapiens GN=SLC1A5 PE=1 SV=2	Q15758	SLC1A5	57 kDa	4	3
Importin subunit beta-1 OS=Homo sapiens GN=KPNB1 PE=1 SV=2	Q14974	KPNB1	97 kDa	4	3
Heterogeneous nuclear ribonucleoprotein L OS=Homo sapiens GN=HNRNPL PE=1 SV=2	P14866	HNRNPL	64 kDa	2	3
Drebrin OS=Homo sapiens GN=DBN1 PE=1 SV=4	Q16643	DBN1	71 kDa	3	3
60S ribosomal protein L22 OS=Homo sapiens GN=RPL22 PE=1 SV=2	P35268	RPL22	15 kDa	3	3
Triosephosphate isomerase OS=Homo sapiens GN=TPI1 PE=1 SV=3	P60174	TPI1	31 kDa	4	3
Thioredoxin domain-containing protein 5 OS=Homo sapiens GN=TXNDC5 PE=1 SV=2	Q8NBS9	TXNDC5	48 kDa	4	3
Spindlin interactor and repressor of chromatin-binding protein OS=Homo sapiens OX=9606 GN=SPINDOC PE=1 SV=3	Q9BUA3	SPINDOC	41 kDa	4	3
Guanine nucleotide-binding protein G(s) subunit alpha isoforms short OS=Homo sapiens GN=GNAS PE=1 SV=1	P63092 (+1)	GNAS	46 kDa	5	3
Ras-related protein Rab-7a OS=Homo sapiens GN=RAB7A PE=1 SV=1	P51149	RAB7A	23 kDa	3	3
Poly(rC)-binding protein 2 OS=Homo sapiens GN=PCBP2 PE=1 SV=1	Q15366	PCBP2	39 kDa	2	3
Plastin-3 OS=Homo sapiens GN=PLS3 PE=1 SV=4	P13797	PLS3	71 kDa	8	3
Acetyl-CoA acetyltransferase, mitochondrial OS=Homo sapiens GN=ACAT1 PE=1 SV=1	P24752	ACAT1	45 kDa	5	3
Aspartate aminotransferase, mitochondrial OS=Homo sapiens GN=GOT2 PE=1 SV=3	P00505	GOT2	48 kDa	5	3
Electron transfer flavoprotein subunit beta OS=Homo sapiens GN=ETFB PE=1 SV=3	P38117	ETFB	28 kDa	3	3
Clathrin heavy chain 1 OS=Homo sapiens GN=CLTC PE=1 SV=5	Q00610	CLTC	192 kDa	3	3
Ras-related protein Rab-11A OS=Homo sapiens GN=RAB11A PE=1 SV=3	P62491 (+1)	RAB11A	24 kDa	4	3
Leucine-rich repeat-containing protein 59 OS=Homo sapiens GN=LRRC59 PE=1 SV=1	Q96AG4	LRRC59	35 kDa	4	3
Cytochrome b-c1 complex subunit 2, mitochondrial OS=Homo sapiens GN=UQCRC2 PE=1 SV=3	P22695	UQCRC2	48 kDa	2	3
Lamina-associated polypeptide 2, isoforms beta/gamma OS=Homo sapiens GN=TMPO PE=1 SV=2	P42167	TMPO	51 kDa	4	3
Aflatoxin B1 aldehyde reductase member 2 OS=Homo sapiens GN=AKR7A2 PE=1 SV=3	O43488	AKR7A2	40 kDa	2	3
Transmembrane protein 109 OS=Homo sapiens GN=TMEM109 PE=1 SV=1	Q9BVC6	TMEM109	26 kDa	2	3
Very-long-chain 3-oxoacyl-CoA reductase OS=Homo sapiens GN=HSD17B12 PE=1 SV=2	Q53GQ0	HSD17B12	34 kDa	1	3
Mitochondrial dicarboxylate carrier OS=Homo sapiens GN=SLC25A10 PE=1 SV=2	Q9UBX3	SLC25A10	31 kDa	0	3
NAD kinase 2, mitochondrial OS=Homo sapiens GN=NADK2 PE=1 SV=2	Q4G0N4	NADK2	49 kDa	4	3
Tyrosine-protein phosphatase non-receptor type 1 OS=Homo sapiens GN=PTPN1 PE=1 SV=1	P18031	PTPN1	50 kDa	4	3
Protein disulfide-isomerase A4 OS=Homo sapiens GN=PDIA4 PE=1 SV=2	P13667	PDIA4	73 kDa	4	3
Putative nucleoside diphosphate kinase OS=Homo sapiens GN=NME2P1 PE=5 SV=1	O60361 (+1)	NME2P1	16 kDa	3	3
Serine--tRNA ligase, mitochondrial OS=Homo sapiens GN=SARS2 PE=1 SV=1	Q9NP81	SARS2	58 kDa	5	3
Electron transfer flavoprotein subunit alpha, mitochondrial OS=Homo sapiens GN=ETFA PE=1 SV=1	P13804	ETFA	35 kDa	4	3
14-3-3 protein beta/alpha OS=Homo sapiens GN=YWHAB PE=1 SV=3	P31946	YWHAB	28 kDa	3	3
Receptor tyrosine-protein kinase erbB-4 OS=Homo sapiens GN=ERBB4 PE=1 SV=1	Q15303	ERBB4	147 kDa	3	3
Abhydrolase domain-containing protein 8 OS=Homo sapiens GN=ABHD8 PE=2 SV=1	Q96I13	ABHD8	47 kDa	0	3
14-3-3 protein zeta/delta OS=Homo sapiens GN=YWHAZ PE=1 SV=1	P63104	YWHAZ	28 kDa	3	3
Peroxiredoxin-2 OS=Homo sapiens GN=PRDX2 PE=1 SV=5	P32119	PRDX2	22 kDa	1	3
Apoptosis-inducing factor 1, mitochondrial OS=Homo sapiens GN=AIFM1 PE=1 SV=1	O95831	AIFM1	67 kDa	3	3
Pyruvate dehydrogenase E1 component subunit alpha, somatic form, mitochondrial OS=Homo sapiens GN=PDHA1 PE=1 SV=3	P08559	PDHA1	43 kDa	4	3
Mitochondrial-processing peptidase subunit beta OS=Homo sapiens GN=PMPCB PE=1 SV=2	O75439	PMPCB	54 kDa	2	3
Succinyl-CoA:3-ketoacid coenzyme A transferase 1, mitochondrial OS=Homo sapiens GN=OXCT1 PE=1 SV=1	P55809	OXCT1	56 kDa	4	3
Surfeit locus protein 4 OS=Homo sapiens GN=SURF4 PE=1 SV=3	O15260	SURF4	30 kDa	2	3
TGF-beta-activated kinase 1 and MAP3K7-binding protein 1 OS=Homo sapiens GN=TAB1 PE=1 SV=1	Q15750	TAB1	55 kDa	2	3
5'-nucleotidase domain-containing protein 2 OS=Homo sapiens GN=NT5DC2 PE=1 SV=1	Q9H857	NT5DC2	61 kDa	1	3
Sodium/potassium-transporting ATPase subunit beta-3 OS=Homo sapiens GN=ATP1B3 PE=1 SV=1	P54709	ATP1B3	32 kDa	1	3
S-adenosylmethionine synthase isoform type-2 OS=Homo sapiens GN=MAT2A PE=1 SV=1	P31153	MAT2A	44 kDa	2	3
B-cell receptor-associated protein 31 OS=Homo sapiens GN=BCAP31 PE=1 SV=3	P51572	BCAP31	28 kDa	2	3
ADP/ATP translocase 3 OS=Homo sapiens GN=SLC25A6 PE=1 SV=4	P12236	SLC25A6	33 kDa	3	2
Heat shock protein HSP 90-alpha OS=Homo sapiens GN=HSP90AA1 PE=1 SV=5	P07900	HSP90AA1	85 kDa	3	2
U4/U6.U5 tri-snRNP-associated protein 1 OS=Homo sapiens GN=SART1 PE=1 SV=1	O43290	SART1	90 kDa	4	2
ATP synthase subunit O, mitochondrial OS=Homo sapiens GN=ATP5O PE=1 SV=1	P48047	ATP5O	23 kDa	2	2
Immunoglobulin kappa variable 2-30 OS=Homo sapiens OX=9606 GN=IGKV2-30 PE=3 SV=2	P06310	IGKV2-30	13 kDa	5	2
Probable ATP-dependent RNA helicase DDX5 OS=Homo sapiens GN=DDX5 PE=1 SV=1	P17844	DDX5	69 kDa	4	2
Ig gamma-2 chain C region OS=Homo sapiens GN=IGHG2 PE=1 SV=2	P01859	IGHG2	36 kDa	4	2
RNA-binding protein 3 OS=Homo sapiens GN=RBM3 PE=1 SV=1	P98179	RBM3	17 kDa	2	2
Plasminogen activator inhibitor 1 RNA-binding protein OS=Homo sapiens GN=SERBP1 PE=1 SV=2	Q8NC51	SERBP1	45 kDa	2	2
Enhancer of rudimentary homolog OS=Homo sapiens GN=ERH PE=1 SV=1	P84090	ERH	12 kDa	2	2
Leucine-rich PPR motif-containing protein, mitochondrial OS=Homo sapiens GN=LRPPRC PE=1 SV=3	P42704	LRPPRC	158 kDa	3	2
40S ribosomal protein S14 OS=Homo sapiens GN=RPS14 PE=1 SV=3	P62263	RPS14	16 kDa	2	2
U1 small nuclear ribonucleoprotein A OS=Homo sapiens GN=SNRPA PE=1 SV=3	P09012	SNRPA	31 kDa	2	2
Serrate RNA effector molecule homolog OS=Homo sapiens GN=SRRT PE=1 SV=1	Q9BXP5	SRRT	101 kDa	3	2
Voltage-dependent anion-selective channel protein 3 OS=Homo sapiens GN=VDAC3 PE=1 SV=1	Q9Y277	VDAC3	31 kDa	1	2
Peroxisomal multifunctional enzyme type 2 OS=Homo sapiens GN=HSD17B4 PE=1 SV=3	P51659	HSD17B4	80 kDa	5	2
Glutaminyl-peptide cyclotransferase OS=Homo sapiens GN=QPCT PE=1 SV=1	Q16769	QPCT	41 kDa	4	2
DNA replication licensing factor MCM6 OS=Homo sapiens GN=MCM6 PE=1 SV=1	Q14566	MCM6	93 kDa	2	2
Adipocyte plasma membrane-associated protein OS=Homo sapiens GN=APMAP PE=1 SV=2	Q9HDC9	APMAP	46 kDa	2	2
Endoplasmic reticulum resident protein 44 OS=Homo sapiens GN=ERP44 PE=1 SV=1	Q9BS26	ERP44	47 kDa	2	2
Cleavage and polyadenylation specificity factor subunit 5 OS=Homo sapiens GN=NUDT21 PE=1 SV=1	O43809	NUDT21	26 kDa	2	2
Minor histocompatibility antigen H13 OS=Homo sapiens GN=HM13 PE=1 SV=1	Q8TCT9	HM13	41 kDa	1	2
Phosphate carrier protein, mitochondrial OS=Homo sapiens GN=SLC25A3 PE=1 SV=2	Q00325	SLC25A3	40 kDa	3	2
Serine/threonine-protein phosphatase 2A 65 kDa regulatory subunit A alpha isoform OS=Homo sapiens GN=PPP2R1A PE=1 SV=4	P30153	PPP2R1A	65 kDa	2	2
LETM1 and EF-hand domain-containing protein 1, mitochondrial OS=Homo sapiens GN=LETM1 PE=1 SV=1	O95202	LETM1	83 kDa	1	2
Heterogeneous nuclear ribonucleoprotein A0 OS=Homo sapiens GN=HNRNPA0 PE=1 SV=1	Q13151	HNRNPA0	31 kDa	2	2
Complement C3 OS=Homo sapiens GN=C3 PE=1 SV=2	P01024	C3	187 kDa	0	2
Cleft lip and palate transmembrane protein 1 OS=Homo sapiens GN=CLPTM1 PE=1 SV=1	O96005	CLPTM1	76 kDa	2	2
Transmembrane protein 33 OS=Homo sapiens GN=TMEM33 PE=1 SV=2	P57088	TMEM33	28 kDa	1	2
RuvB-like 2 OS=Homo sapiens GN=RUVBL2 PE=1 SV=3	Q9Y230	RUVBL2	51 kDa	1	2
Growth hormone-inducible transmembrane protein OS=Homo sapiens GN=GHITM PE=1 SV=2	Q9H3K2	GHITM	37 kDa	0	2
Serine/arginine-rich splicing factor 1 OS=Homo sapiens GN=SRSF1 PE=1 SV=2	Q07955	SRSF1	28 kDa	2	2
7-dehydrocholesterol reductase OS=Homo sapiens GN=DHCR7 PE=1 SV=1	Q9UBM7	DHCR7	54 kDa	1	2
Pre-mRNA-processing factor 19 OS=Homo sapiens GN=PRPF19 PE=1 SV=1	Q9UMS4	PRPF19	55 kDa	0	2
Protein LSM14 homolog A OS=Homo sapiens GN=LSM14A PE=1 SV=3	Q8ND56	LSM14A	51 kDa	0	2
Very-long-chain enoyl-CoA reductase OS=Homo sapiens GN=TECR PE=1 SV=1	Q9NZ01	TECR	36 kDa	0	2
Peroxiredoxin-6 OS=Homo sapiens GN=PRDX6 PE=1 SV=3	P30041	PRDX6	25 kDa	6	2
T-complex protein 1 subunit epsilon OS=Homo sapiens GN=CCT5 PE=1 SV=1	P48643	CCT5	60 kDa	4	2
Prolow-density lipoprotein receptor-related protein 1 OS=Homo sapiens GN=LRP1 PE=1 SV=2	Q07954	LRP1	505 kDa	2	2
Isocitrate dehydrogenase [NAD] subunit alpha, mitochondrial OS=Homo sapiens GN=IDH3A PE=1 SV=1	P50213	IDH3A	40 kDa	3	2
Haloacid dehalogenase-like hydrolase domain-containing 5 OS=Homo sapiens OX=9606 GN=HDHD5 PE=1 SV=1	Q9BXW7	HDHD5	46 kDa	3	2
Adenylate kinase 2, mitochondrial OS=Homo sapiens GN=AK2 PE=1 SV=2	P54819	AK2	26 kDa	2	2
Regulator of chromosome condensation OS=Homo sapiens GN=RCC1 PE=1 SV=1	P18754	RCC1	45 kDa	2	2
Brain acid soluble protein 1 OS=Homo sapiens GN=BASP1 PE=1 SV=2	P80723	BASP1	23 kDa	2	2
Vesicle-associated membrane protein-associated protein A OS=Homo sapiens GN=VAPA PE=1 SV=3	Q9P0L0	VAPA	28 kDa	3	2
Cofilin-1 OS=Homo sapiens GN=CFL1 PE=1 SV=3	P23528	CFL1	19 kDa	3	2
N-acylneuraminate cytidylyltransferase OS=Homo sapiens GN=CMAS PE=1 SV=2	Q8NFW8	CMAS	48 kDa	3	2
Serine/threonine-protein phosphatase PP1-beta catalytic subunit OS=Homo sapiens GN=PPP1CB PE=1 SV=3	P62140	PPP1CB	37 kDa	3	2
Isocitrate dehydrogenase [NAD] subunit beta, mitochondrial OS=Homo sapiens GN=IDH3B PE=1 SV=2	O43837	IDH3B	42 kDa	3	2
Actin-related protein 3 OS=Homo sapiens GN=ACTR3 PE=1 SV=3	P61158	ACTR3	47 kDa	2	2
MARCKS-related protein OS=Homo sapiens GN=MARCKSL1 PE=1 SV=2	P49006	MARCKSL1	20 kDa	2	2
ELAV-like protein 1 OS=Homo sapiens GN=ELAVL1 PE=1 SV=2	Q15717	ELAVL1	36 kDa	2	2
Guanine nucleotide-binding protein G(i) subunit alpha-2 OS=Homo sapiens GN=GNAI2 PE=1 SV=3	P04899	GNAI2	40 kDa	2	2
Glycerol-3-phosphate dehydrogenase, mitochondrial OS=Homo sapiens GN=GPD2 PE=1 SV=3	P43304	GPD2	81 kDa	2	2
Glutathione reductase, mitochondrial OS=Homo sapiens GN=GSR PE=1 SV=2	P00390	GSR	56 kDa	1	2
Inorganic pyrophosphatase 2, mitochondrial OS=Homo sapiens GN=PPA2 PE=1 SV=2	Q9H2U2	PPA2	38 kDa	2	2
Cob(I)yrinic acid a,c-diamide adenosyltransferase, mitochondrial OS=Homo sapiens GN=MMAB PE=1 SV=1	Q96EY8	MMAB	27 kDa	2	2
NADH dehydrogenase [ubiquinone] iron-sulfur protein 3, mitochondrial OS=Homo sapiens GN=NDUFS3 PE=1 SV=1	O75489	NDUFS3	30 kDa	2	2
Calponin-3 OS=Homo sapiens GN=CNN3 PE=1 SV=1	Q15417	CNN3	36 kDa	3	2
Thioredoxin OS=Homo sapiens GN=TXN PE=1 SV=3	P10599	TXN	12 kDa	1	2
Cysteine desulfurase, mitochondrial OS=Homo sapiens GN=NFS1 PE=1 SV=3	Q9Y697	NFS1	50 kDa	2	2
Protein arginine N-methyltransferase 1 OS=Homo sapiens GN=PRMT1 PE=1 SV=2	Q99873	PRMT1	42 kDa	0	2
Mitochondrial import receptor subunit TOM40 homolog OS=Homo sapiens GN=TOMM40 PE=1 SV=1	O96008	TOMM40	38 kDa	2	2
Transgelin-2 OS=Homo sapiens GN=TAGLN2 PE=1 SV=3	P37802	TAGLN2	22 kDa	3	2
Mitochondrial import inner membrane translocase subunit TIM50 OS=Homo sapiens GN=TIMM50 PE=1 SV=2	Q3ZCQ8	TIMM50	40 kDa	2	2
Membrane-associated progesterone receptor component 1 OS=Homo sapiens GN=PGRMC1 PE=1 SV=3	O00264	PGRMC1	22 kDa	3	2
Methylcrotonoyl-CoA carboxylase beta chain, mitochondrial OS=Homo sapiens GN=MCCC2 PE=1 SV=1	Q9HCC0	MCCC2	61 kDa	1	2
Magnesium transporter protein 1 OS=Homo sapiens GN=MAGT1 PE=1 SV=1	Q9H0U3	MAGT1	38 kDa	2	2
Aconitate hydratase, mitochondrial OS=Homo sapiens GN=ACO2 PE=1 SV=2	Q99798	ACO2	85 kDa	2	2
Proteolipid protein 2 OS=Homo sapiens GN=PLP2 PE=1 SV=1	Q04941	PLP2	17 kDa	2	2
Mitochondrial antiviral-signaling protein OS=Homo sapiens GN=MAVS PE=1 SV=2	Q7Z434	MAVS	57 kDa	0	2
Calumenin OS=Homo sapiens GN=CALU PE=1 SV=2	O43852	CALU	37 kDa	2	2
Ras-related protein Rab-6A OS=Homo sapiens GN=RAB6A PE=1 SV=3	P20340	RAB6A	24 kDa	2	2
NADH dehydrogenase [ubiquinone] 1 alpha subcomplex assembly factor 3 OS=Homo sapiens GN=NDUFAF3 PE=1 SV=1	Q9BU61	NDUFAF3	20 kDa	0	2
Succinate dehydrogenase [ubiquinone] flavoprotein subunit, mitochondrial OS=Homo sapiens GN=SDHA PE=1 SV=2	P31040	SDHA	73 kDa	0	2
Cytoskeleton-associated protein 4 OS=Homo sapiens GN=CKAP4 PE=1 SV=2	Q07065	CKAP4	66 kDa	1	2
Elongation factor 1-delta OS=Homo sapiens GN=EEF1D PE=1 SV=5	P29692	EEF1D	31 kDa	1	2
Protein sidekick-2 OS=Homo sapiens GN=SDK2 PE=1 SV=3	Q58EX2	SDK2	239 kDa	0	2
Polymerase delta-interacting protein 3 OS=Homo sapiens GN=POLDIP3 PE=1 SV=2	Q9BY77	POLDIP3	46 kDa	2	1
Immunoglobulin kappa variable 2-24 OS=Homo sapiens OX=9606 GN=IGKV2-24 PE=3 SV=1	A0A0C4DH68	IGKV2-24	13 kDa	1	1
Cleavage and polyadenylation specificity factor subunit 6 OS=Homo sapiens GN=CPSF6 PE=1 SV=2	Q16630	CPSF6	59 kDa	3	1
E3 ubiquitin-protein ligase TRIM21 OS=Homo sapiens GN=TRIM21 PE=1 SV=1	P19474	TRIM21	54 kDa	2	1
T-complex protein 1 subunit theta OS=Homo sapiens GN=CCT8 PE=1 SV=4	P50990	CCT8	60 kDa	0	1
Protein arginine N-methyltransferase 5 OS=Homo sapiens GN=PRMT5 PE=1 SV=4	O14744	PRMT5	73 kDa	3	1
Mitochondrial import receptor subunit TOM22 homolog OS=Homo sapiens GN=TOMM22 PE=1 SV=3	Q9NS69	TOMM22	16 kDa	3	1
Heterogeneous nuclear ribonucleoprotein D0 OS=Homo sapiens GN=HNRNPD PE=1 SV=1	Q14103	HNRNPD	38 kDa	3	1
Lamin-B2 OS=Homo sapiens GN=LMNB2 PE=1 SV=3	Q03252	LMNB2	68 kDa	1	1
Protein RCC2 OS=Homo sapiens GN=RCC2 PE=1 SV=2	Q9P258	RCC2	56 kDa	3	1
Serum albumin OS=Homo sapiens GN=ALB PE=1 SV=2	P02768	ALB	69 kDa	3	1
U1 small nuclear ribonucleoprotein 70 kDa OS=Homo sapiens GN=SNRNP70 PE=1 SV=2	P08621	SNRNP70	52 kDa	2	1
T-complex protein 1 subunit eta OS=Homo sapiens GN=CCT7 PE=1 SV=2	Q99832	CCT7	59 kDa	0	1
Extended synaptotagmin-1 OS=Homo sapiens GN=ESYT1 PE=1 SV=1	Q9BSJ8	ESYT1	123 kDa	1	1
T-complex protein 1 subunit delta OS=Homo sapiens GN=CCT4 PE=1 SV=4	P50991	CCT4	58 kDa	1	1
Large neutral amino acids transporter small subunit 1 OS=Homo sapiens GN=SLC7A5 PE=1 SV=2	Q01650	SLC7A5	55 kDa	0	1
Mucin-12 OS=Homo sapiens OX=9606 GN=MUC12 PE=1 SV=2	MUC12_HUMAN-DECOY		?	1	1
Catalase OS=Homo sapiens GN=CAT PE=1 SV=3	P04040	CAT	60 kDa	1	1
Plectin OS=Homo sapiens GN=PLEC PE=1 SV=3	Q15149	PLEC	532 kDa	0	1
ADP-ribosylation factor-like protein 2-binding protein OS=Homo sapiens GN=ARL2BP PE=1 SV=1	Q9Y2Y0	ARL2BP	19 kDa	0	1
Immunoglobulin kappa variable 2-28 OS=Homo sapiens OX=9606 GN=IGKV2-28 PE=3 SV=1	A0A075B6P5	IGKV2-28	13 kDa	2	1
40S ribosomal protein S4, X isoform OS=Homo sapiens GN=RPS4X PE=1 SV=2	P62701	RPS4X	30 kDa	3	1
DNA replication licensing factor MCM2 OS=Homo sapiens GN=MCM2 PE=1 SV=4	P49736	MCM2	102 kDa	4	1
Protein transport protein Sec61 subunit alpha isoform 1 OS=Homo sapiens GN=SEC61A1 PE=1 SV=2	P61619	SEC61A1	52 kDa	3	1
Dermcidin OS=Homo sapiens GN=DCD PE=1 SV=2	P81605	DCD	11 kDa	2	1
Interleukin enhancer-binding factor 2 OS=Homo sapiens GN=ILF2 PE=1 SV=2	Q12905	ILF2	43 kDa	1	1
Serine/threonine-protein kinase 38-like OS=Homo sapiens GN=STK38L PE=1 SV=3	Q9Y2H1	STK38L	54 kDa	2	1
Cytochrome c oxidase subunit 4 isoform 1, mitochondrial OS=Homo sapiens GN=COX4I1 PE=1 SV=1	P13073	COX4I1	20 kDa	2	1
Interleukin enhancer-binding factor 3 OS=Homo sapiens GN=ILF3 PE=1 SV=3	Q12906	ILF3	95 kDa	2	1
Eukaryotic initiation factor 4A-I OS=Homo sapiens GN=EIF4A1 PE=1 SV=1	P60842	EIF4A1	46 kDa	3	1
Low-density lipoprotein receptor-related protein 4 OS=Homo sapiens GN=LRP4 PE=1 SV=4	O75096	LRP4	212 kDa	2	1
Adenosylhomocysteinase OS=Homo sapiens GN=AHCY PE=1 SV=4	P23526	AHCY	48 kDa	2	1
Heterogeneous nuclear ribonucleoprotein R OS=Homo sapiens GN=HNRNPR PE=1 SV=1	O43390	HNRNPR	71 kDa	3	1
Eukaryotic peptide chain release factor GTP-binding subunit ERF3A OS=Homo sapiens GN=GSPT1 PE=1 SV=1	P15170	GSPT1	56 kDa	2	1
Ran GTPase-activating protein 1 OS=Homo sapiens GN=RANGAP1 PE=1 SV=1	P46060	RANGAP1	64 kDa	2	1
F-actin-capping protein subunit alpha-1 OS=Homo sapiens GN=CAPZA1 PE=1 SV=3	P52907	CAPZA1	33 kDa	1	1
10 kDa heat shock protein, mitochondrial OS=Homo sapiens GN=HSPE1 PE=1 SV=2	P61604	HSPE1	11 kDa	1	1
Lethal(2) giant larvae protein homolog 1 OS=Homo sapiens GN=LLGL1 PE=1 SV=3	Q15334	LLGL1	115 kDa	1	1
Protein transport protein Sec61 subunit beta OS=Homo sapiens GN=SEC61B PE=1 SV=2	P60468	SEC61B	10 kDa	2	1
Aldehyde dehydrogenase, mitochondrial OS=Homo sapiens GN=ALDH2 PE=1 SV=2	P05091	ALDH2	56 kDa	2	1
Methionine adenosyltransferase 2 subunit beta OS=Homo sapiens GN=MAT2B PE=1 SV=1	Q9NZL9	MAT2B	38 kDa	1	1
Adenylyl cyclase-associated protein 1 OS=Homo sapiens GN=CAP1 PE=1 SV=5	Q01518	CAP1	52 kDa	0	1
Succinate dehydrogenase [ubiquinone] iron-sulfur subunit, mitochondrial OS=Homo sapiens GN=SDHB PE=1 SV=3	P21912	SDHB	32 kDa	2	1
Small nuclear ribonucleoprotein Sm D1 OS=Homo sapiens GN=SNRPD1 PE=1 SV=1	P62314	SNRPD1	13 kDa	0	1
Ras-related protein Rab-21 OS=Homo sapiens GN=RAB21 PE=1 SV=3	Q9UL25	RAB21	24 kDa	2	1
Luc7-like protein 3 OS=Homo sapiens GN=LUC7L3 PE=1 SV=2	O95232	LUC7L3	51 kDa	0	1
2',3'-cyclic-nucleotide 3'-phosphodiesterase OS=Homo sapiens GN=CNP PE=1 SV=2	P09543	CNP	48 kDa	2	1
Tropomyosin alpha-3 chain OS=Homo sapiens GN=TPM3 PE=1 SV=2	P06753	TPM3	33 kDa	2	1
Glutamine synthetase OS=Homo sapiens GN=GLUL PE=1 SV=4	P15104	GLUL	42 kDa	0	1
ATP-dependent Clp protease ATP-binding subunit clpX-like, mitochondrial OS=Homo sapiens GN=CLPX PE=1 SV=2	O76031	CLPX	69 kDa	2	1
Calcium-binding mitochondrial carrier protein Aralar2 OS=Homo sapiens GN=SLC25A13 PE=1 SV=2	Q9UJS0	SLC25A13	74 kDa	2	1
DNA damage-binding protein 1 OS=Homo sapiens GN=DDB1 PE=1 SV=1	Q16531	DDB1	127 kDa	0	1
DnaJ homolog subfamily B member 11 OS=Homo sapiens GN=DNAJB11 PE=1 SV=1	Q9UBS4	DNAJB11	41 kDa	2	1
Heterogeneous nuclear ribonucleoproteins C1/C2 OS=Homo sapiens GN=HNRNPC PE=1 SV=4	P07910	HNRNPC	34 kDa	2	0
Histone H1.2 OS=Homo sapiens GN=HIST1H1C PE=1 SV=2	P16403	HIST1H1C	21 kDa	1	0
Neuroblast differentiation-associated protein AHNAK OS=Homo sapiens GN=AHNAK PE=1 SV=2	Q09666	AHNAK	629 kDa	5	0
Methylosome protein 50 OS=Homo sapiens GN=WDR77 PE=1 SV=1	Q9BQA1	WDR77	37 kDa	1	0
Transferrin receptor protein 1 OS=Homo sapiens GN=TFRC PE=1 SV=2	P02786	TFRC	85 kDa	1	0
LIM domain only protein 7 OS=Homo sapiens GN=LMO7 PE=1 SV=3	Q8WWI1	LMO7	193 kDa	1	0
Cleavage and polyadenylation specificity factor subunit 7 OS=Homo sapiens GN=CPSF7 PE=1 SV=1	Q8N684	CPSF7	52 kDa	1	0
Probable ATP-dependent RNA helicase DDX46 OS=Homo sapiens GN=DDX46 PE=1 SV=2	Q7L014	DDX46	117 kDa	1	0
L-lactate dehydrogenase A chain OS=Homo sapiens GN=LDHA PE=1 SV=2	P00338	LDHA	37 kDa	3	0
Nucleolin OS=Homo sapiens GN=NCL PE=1 SV=3	P19338	NCL	77 kDa	2	0
Protein S100-A9 OS=Homo sapiens GN=S100A9 PE=1 SV=1	P06702	S100A9	13 kDa	2	0
Protein S100-A8 OS=Homo sapiens GN=S100A8 PE=1 SV=1	P05109	S100A8	11 kDa	1	0
DNA topoisomerase 1 OS=Homo sapiens GN=TOP1 PE=1 SV=2	P11387	TOP1	91 kDa	3	0
Histone H2A.Z OS=Homo sapiens GN=H2AFZ PE=1 SV=2	P0C0S5 (+1)	H2AFZ	14 kDa	1	0
Nuclear autoantigenic sperm protein OS=Homo sapiens GN=NASP PE=1 SV=2	P49321	NASP	85 kDa	1	0
Prolow-density lipoprotein receptor-related protein 1 OS=Homo sapiens OX=9606 GN=LRP1 PE=1 SV=2	LRP1_HUMAN-DECOY		?	2	0
tRNA methyltransferase 10 homolog C OS=Homo sapiens OX=9606 GN=TRMT10C PE=1 SV=2	Q7L0Y3	TRMT10C	47 kDa	3	0
Succinate-semialdehyde dehydrogenase, mitochondrial OS=Homo sapiens GN=ALDH5A1 PE=1 SV=2	P51649	ALDH5A1	57 kDa	2	0
Heterogeneous nuclear ribonucleoprotein A/B OS=Homo sapiens GN=HNRNPAB PE=1 SV=2	Q99729	HNRNPAB	36 kDa	2	0
L-lactate dehydrogenase B chain OS=Homo sapiens GN=LDHB PE=1 SV=2	P07195	LDHB	37 kDa	0	0
Dihydrolipoyl dehydrogenase, mitochondrial OS=Homo sapiens GN=DLD PE=1 SV=2	P09622	DLD	54 kDa	2	0
Tenascin OS=Homo sapiens GN=TNC PE=1 SV=3	P24821	TNC	241 kDa	2	0
Zinc finger protein DZIP1 OS=Homo sapiens GN=DZIP1 PE=1 SV=1	Q86YF9	DZIP1	99 kDa	2	0
Chloride channel CLIC-like protein 1 OS=Homo sapiens GN=CLCC1 PE=1 SV=1	Q96S66	CLCC1	62 kDa	2	0
cAMP-dependent protein kinase type II-alpha regulatory subunit OS=Homo sapiens GN=PRKAR2A PE=1 SV=2	P13861	PRKAR2A	46 kDa	2	0
Peptidyl-prolyl cis-trans isomerase FKBP8 OS=Homo sapiens GN=FKBP8 PE=1 SV=2	Q14318	FKBP8	45 kDa	0	0
E3 ubiquitin-protein ligase UHRF1 OS=Homo sapiens GN=UHRF1 PE=1 SV=1	Q96T88	UHRF1	90 kDa	2	0
GTP-binding protein SAR1a OS=Homo sapiens GN=SAR1A PE=1 SV=1	Q9NR31	SAR1A	22 kDa	2	0
Heterogeneous nuclear ribonucleoprotein U-like protein 1 OS=Homo sapiens GN=HNRNPUL1 PE=1 SV=2	Q9BUJ2	HNRNPUL1	96 kDa	2	0
Translocon-associated protein subunit delta OS=Homo sapiens GN=SSR4 PE=1 SV=1	P51571	SSR4	19 kDa	2	0
