# Supplementary material for: Disrupting the ciliary gradient of active Arl3 affects rod photoreceptor nuclear migration
Source: eLife journal article supplement (doi:10.7554/elife.80533), 2023-01-04
Supplement: supp [file elife_poa_e80533_Figure_4_source_data_1.docx]

| Protein | Role | Size | Unique Spectrum Count | | Expected size of complex with Arl3-FLAG |
| --- | --- | --- | --- | --- | --- |
| Q71L | T31N |
| RP2 | Arl3 GAP | 40 kDa | 11 | 3 | 65 kDa |
| UNC119A/B | Arl3 effector | 28 kDa | 4 | 0 | 53 kDa |
| BART | Arl3 co-GEF | 19 kDa | 1 | 0 | 44 kDa |
